# Supplementary material
Source: publisher site journal article supplement (https://www.dovepress.com/article/453238)
Supplement: Supplementary file 1 [file get_supplementary_file.php]

**Supplementary Table S1** Measures used in this study

| Measures | Items | Response scale |
| --- | --- | --- |
| Depression (DRPST): In recent one month, do you have the following symptoms persisted more than two weeks? | Item 1: Depressed mood most of the day, nearly every day. | 0 = no, 1 = yes |
| Item 2: Fatigue or loss of energy nearly every day. | 0 = no, 1 = yes |
| Item 3: Feeling of worthlessness or excessive or inappropriate guilt nearly every day | 0 = no, 1 = yes |
| PTSD (DRPST): In recent one month, do you have the following symptoms persisted more than one week due to COVID-19 | Item 1: Hypervigilance or difficulty to be relaxed, even without information about COVID-19. | 1 = not at all, 2 = minimal, 3 = moderate, 4 = predominant, 5 = extreme |
| Item 2: Emergence of somatic symptoms (e.g. palpitation, tremor, sweating, or muscle rigidity) when hearing about COVID-19 | 1 = not at all, 2 = minimal, 3 = moderate, 4 = predominant, 5 = extreme |
| Item 3: Efforts to avoid activities, places, people or information that arouse recollections of the COVID-19. | 1 = not at all, 2 = minimal, 3 = moderate, 4 = predominant, 5 = extreme |
| Item 4: Acting or feeling as if the trauma were recurring (re-experience), and feel distressed. | 1 = not at all, 2 = minimal, 3 = moderate, 4 = predominant, 5 = extreme |
| Sleep (PSQI): During the past month,…. | Item 1: Do you cannot get to sleep within 30 minutes? | 1 = not during the past month, 2 = less than once a week, 3 = once or twice a week, 4 = three or more times a week. |
| Item 2: Do you wake up in the middle night or early morning, and you cannot sleep again? | 1 = not during the past month, 2 = less than once a week, 3 = once or twice a week, 4 = three or more times a week. |
| Item 3: How would you rate your sleep quality overall? | 1 = very good, 2 = fairly good, 3 = fairly bad, 4 = very bad. |
| Item 4: How much of a problem has it been for you to keep up enough enthusiasm to get things done? | 1 = not a problem at all, 2 = only a very slight problem, 3 = somewhat of a problem, 4 = a very big problem. |
| Social desirability (SISQ): How has COVID-19 impacted you? | Item 1: I believe that self-health management is helpful in controlling the spread  of COVID-19 | 1 = never (0%), 2 = Rarely (10%), 3 = sometimes (30%), 4 = often (60% or above) |
| Item 2: I have faith in our current government’s epidemic response and risk  management | 1 = never (0%), 2 = Rarely (10%), 3 = sometimes (30%), 4 = often (60% or above) |
| Item 3: I comply with the government’s implementations of epidemic response in  the community | 1 = never (0%), 2 = Rarely (10%), 3 = sometimes (30%), 4 = often (60% or above) |
| Dependence level (SDS): How you have felt about  your use of substance over the last twelve months? | Item 1: Do you think your use of (substance) was out of control? | 0 = never, 1 = sometimes, 2 = often, 3 = always |
| Item 2: Did the prospect of missing a fix, shot or dose make you feel anxious or worried? | 0 = never, 1 = sometimes, 2 = often, 3 = always |
| Item 3: Did you worry about your use of  (substance)? | 0 = never, 1 = sometimes, 2 = often, 3 = always |
| Item 4: Did you wish you could stop? | 0 = never, 1 = sometimes, 2 = often, 3 = always |
| Item 5: How difficult did you find it to  stop or go without (substance)? | 0 = not difficult, 1 = quite difficult, 2 = very difficult, 3 = impossible |
| Concerns about commercial  profiteering (VAX): What specific concerns  do you have about vaccinations? | Item 1: Vaccines make a lot of money for pharmaceutical companies, but do not do much for regular people. | 1 = strongly disagree, 2 = disagree, 3 = somewhat disagree, 4 = somewhat agree, 5 = agree, 6 = strongly agree |
| Item 2: Authorities promote vaccination for financial gain, not for people’s health | 1 = strongly disagree, 2 = disagree, 3 = somewhat disagree, 4 = somewhat agree, 5 = agree, 6 = strongly agree |
| Item 3: Vaccination programs are a big con. | 1 = strongly disagree, 2 = disagree, 3 = somewhat disagree, 4 = somewhat agree, 5 = agree, 6 = strongly agree |

DRPST= Disaster-Related Psychological Screening Test

PTSD= Post-traumatic stress disorder

PSQI= Pittsburgh Sleep Quality Index

SISQ= Societal Influences Survey Questionnaires

SDS= Severity of Dependence Scale

VAX= Vaccination Attitudes Examination Scale
